## RESEARCH ARTICLE

# Association between maternal fermented food consumption and infant sleep duration: The Japan Environment and Children's Study

Narumi Sugimori<sup>1</sup>, Kei Hamazaki<sup>1,2</sup>, Kenta Matsumura<sup>1,2</sup>, Haruka Kasamatsu<sup>2</sup>, Akiko Tsuchida<sup>1,2</sup>, Hidekuni Inadera<sup>1,2\*</sup>, on behalf of the Japan Environment and Children's Study Group<sup>†</sup>

**1** Department of Public Health, Faculty of Medicine, University of Toyama, Toyama, Japan, **2** Toyama Regional Center for JECS, University of Toyama, Toyama, Japan

<sup>†</sup> Study Group members are listed in the Acknowledgments.

\* [inadera@med.u-toyama.ac.jp](mailto:inadera@med.u-toyama.ac.jp)

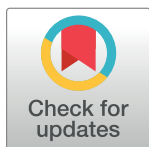

## OPEN ACCESS

**Citation:** Sugimori N, Hamazaki K, Matsumura K, Kasamatsu H, Tsuchida A, Inadera H, et al. (2019) Association between maternal fermented food consumption and infant sleep duration: The Japan Environment and Children's Study. PLoS ONE 14 (10): e0222792. <https://doi.org/10.1371/journal.pone.0222792>

**Editor:** Marly A. Cardoso, Universidade de Sao Paulo, BRAZIL

**Received:** May 25, 2019

**Accepted:** September 6, 2019

**Published:** October 4, 2019

**Copyright:** © 2019 Sugimori et al. This is an open access article distributed under the terms of the [Creative Commons Attribution License](https://creativecommons.org/licenses/by/4.0/), which permits unrestricted use, distribution, and reproduction in any medium, provided the original author and source are credited.

**Data Availability Statement:** Data are unsuitable for public deposition due to ethical restrictions and legal framework of Japan. It is prohibited by the Act on the Protection of Personal Information (Act No.57 of 30 May 2003, amendment on 9 September 2015) to publicly deposit the data containing personal information. Ethical Guidelines for Epidemiological Research enforced by the Japan Ministry of Education, Culture, Sports, Science and Technology and the Ministry of Health, Labour and Welfare also restricts the open sharing

## Abstract

### Background

Evidence indicates that human circadian rhythm is affected by the intestinal microbiota, and establishment of the circadian rhythm begins during fetal development. However, the relationship between maternal fermented food intake and infant sleep duration has not been previously investigated. In this study, we examined whether dietary consumption of fermented food during pregnancy is associated with infant sleep duration at 1 year of age.

### Methods

This birth cohort study used data from a nationwide government-funded study called The Japan Environment and Children's Study (JECS). After exclusions from a dataset comprising 104,065 JECS records, we evaluated 72,624 mother-child pairs where the child was 1 year old. We investigated the association between dietary intake of fermented foods during pregnancy and infant sleep duration of less than 11 h at 1 year of age.

### Results

Multivariable logistic regression showed that maternal intake of fermented food, especially *miso*, during the pregnancy was independently associated with reduced risk of infant sleep duration of less than 11 h.

### Conclusions

Further research, including interventional studies, is warranted to confirm the association between consumption of fermented foods during pregnancy and sufficient infant sleep duration.

### Trial registration

[UMIN000030786](https://clinicaltrials.gov/ct2/show/study/UMIN000030786).

of the epidemiologic data. All inquiries about access to data should be sent to: [jecs-en@nies.go.jp](mailto:jecs-en@nies.go.jp). The person responsible for handling enquiries sent to this e-mail address is Dr Shoji F. Nakayama, JECS Programme Office, National Institute for Environmental Studies.

**Funding:** The JECS is funded by the Ministry of the Environment, Japan. The funders had no role in study design, data collection and analysis, decision to publish, or preparation of the manuscript.

**Competing interests:** The authors have declared that no competing interests exist.

**Abbreviations:** CI, confidence interval; OR, odds ratio; JECS, Japan Environment and Children's Study.

## Introduction

Infants require sleep of sufficient duration and quality for healthy development. Sleep patterns commensurate with the child's development change during the neonatal period and infancy. If these changes go beyond the normal range, developmental problems can occur, ranging from increased risk of obesity to neurodevelopmental disorders. For example, 6-year-olds who had short sleep duration in early infancy had a greater risk of hyperactivity than those who had adequate sleep duration [1]. Staying up late and short sleep duration have been linked to physical developmental issues, especially obesity, in 3-year-olds [2]. Also, sleep duration of less than 10.5 h before the age of 3 years was identified as a risk factor for infant obesity [3]. The importance of investigating the causes and effects of insufficient sleep duration in infancy are therefore clear and have been attracting researchers' attention.

The dietary habits of expectant mothers are lifestyle factors that are generally recognized to affect fetuses and infants. Recently, food products containing probiotics have been actively promoted as part of the maternal diet and have garnered considerable interest [4]. Specifically, certain types of fermented food are thought to affect the intestinal microbiota and have been linked to the maintenance of maternal health [5, 6], or conversely the onset of illness, depending on the amount consumed [7, 8]. In addition, maternal microbiota and several other factors have been shown to affect the microbiota of infants [9–12]. Taken together with reports describing an association between infant microbiota and infant neurocognitive development [13, 14], the extent of maternal intake of fermented food may affect the normal development of fetuses, neonates, and infants, especially their sleep duration, which can be regarded as an indicator of normal development. However, the association between such intake and infant sleep duration has not been investigated on a sufficient scale in epidemiological studies.

In this study, we investigated whether maternal intake of fermented food during pregnancy affects infant sleep duration. We used logistic regression analysis of fixed data from mothers and their 1-year-old children obtained in a large-scale cohort study, the Japan Environment and Children's Study (JECS).

## Materials and methods

### Study population

The JECS protocol has been described in detail elsewhere [15, 16]. Briefly, the aim of the JECS, a nationwide government-funded birth cohort study, is to determine the impact of certain environmental factors on child health and development. JECS participants were women in the first trimester of pregnancy from 15 regions of Japan who were enrolled from January 2011 to March 2014 [15, 16]. The eligibility criteria for participants (expectant mothers) were as follows: 1) resident in a study area at the time of recruitment and expected to reside continually in Japan for the foreseeable future, 2) expected delivery date between 1 August 2011 and mid-2014, and 3) able to participate in the study without difficulty (i.e., able to understand Japanese and to complete the self-administered questionnaire). Excluded were expectant mothers residing outside a study area even if visiting cooperating healthcare providers within a study area [15]. The present study analyzed the *jecs-an-20180131* dataset released in March 2018. The full dataset comprises 104,065 records obtained in a questionnaire survey of the participants. We excluded 3,921 and 1,889 records because of miscarriages/still births and multiple births, respectively (Fig 1), 24,424 records because of incomplete answers on the questionnaire, and 315 records for infants whose sleep duration was recorded as 0. The study protocol was approved by the Institutional Review Board on Epidemiological Studies of the Japanese Ministry of the Environment, and the ethics committees of all participating institutions: the National

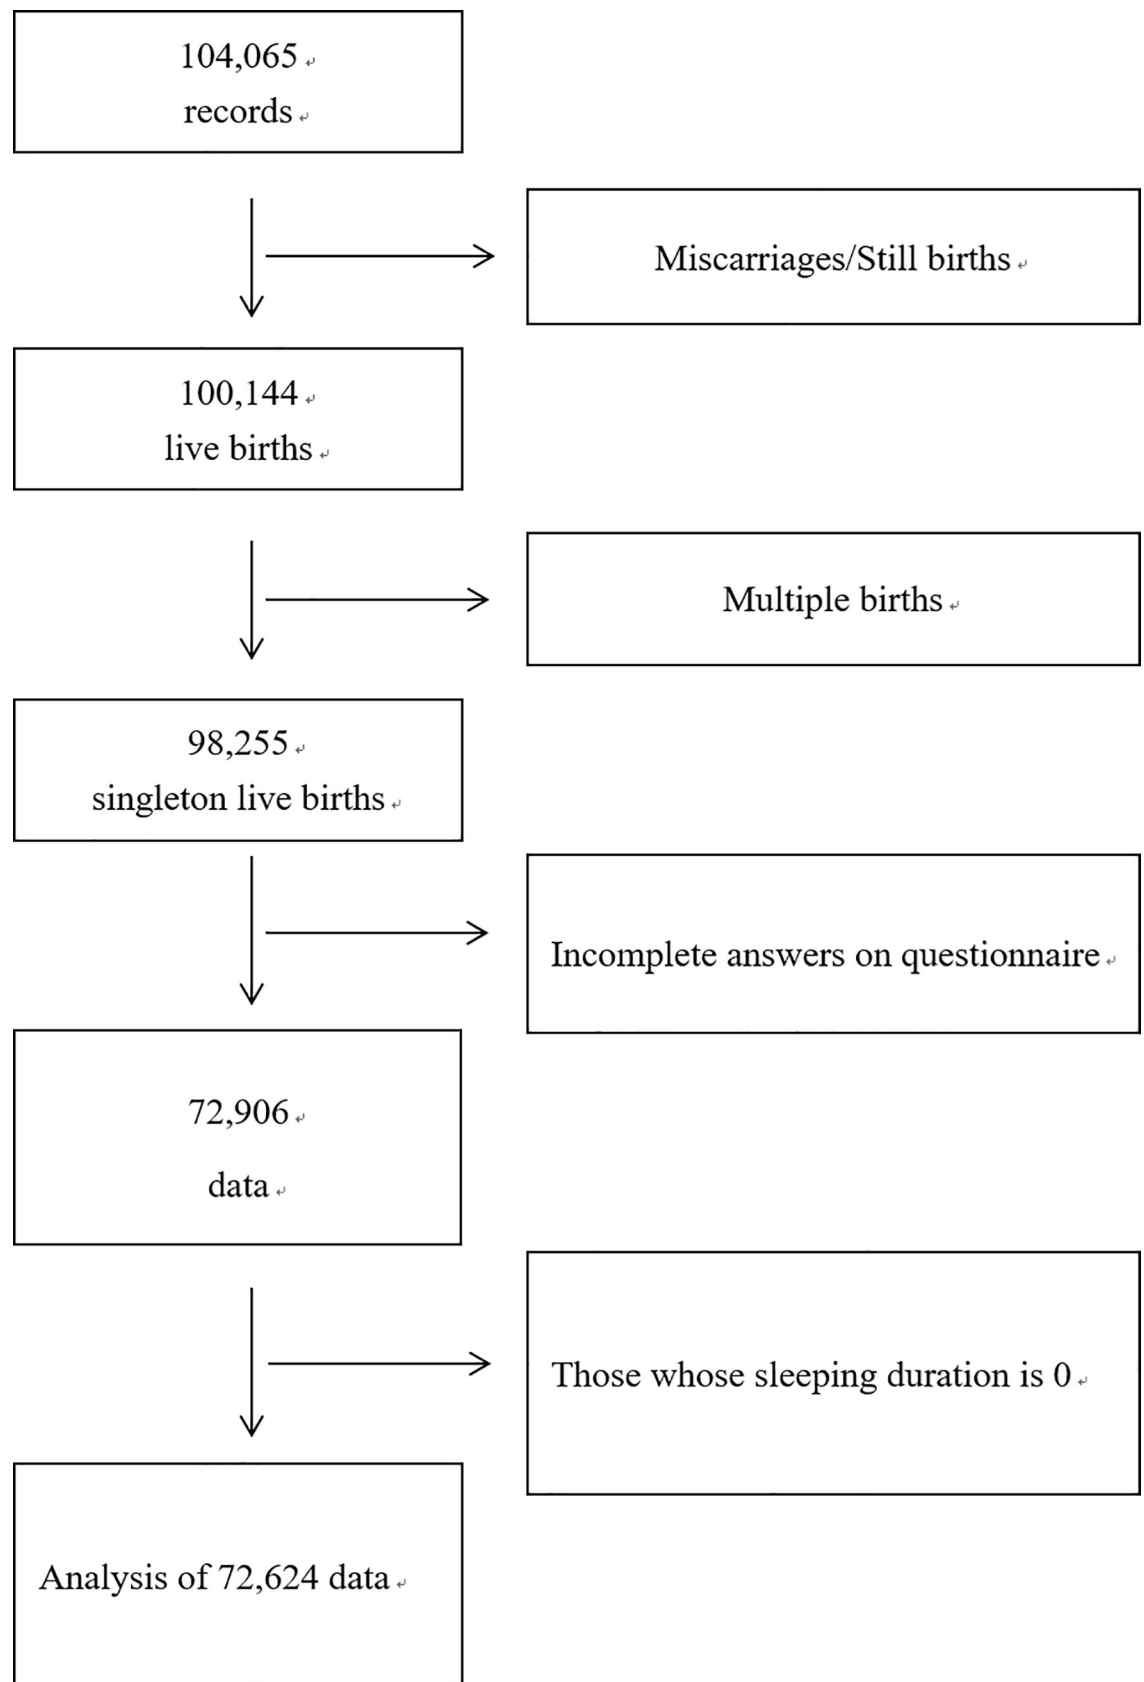

**Fig 1. Flow diagram of the recruitment and exclusion process for participants.**

<https://doi.org/10.1371/journal.pone.0222792.g001>

Institute for Environmental Studies, National Center for Child Health and Development, Hokkaido University, Sapporo Medical University, Asahikawa Medical College, Japanese Red Cross Hokkaido College of Nursing, Tohoku University, Fukushima Medical University, Chiba University, Yokohama City University, University of Yamanashi, Shinshu University, University of Toyama, Nagoya City University, Kyoto University, Doshisha University, Osaka University, Osaka Medical Center and Research Institute for Maternal and Child Health, Hyogo College of Medicine, Tottori University, Kochi University, University of Occupational and Environmental Health, Kyushu University, Kumamoto University, University of Miyazaki, and University of the Ryukyus. All participants provided written informed consent. The JECS is conducted in accordance with the Helsinki Declaration and all other national regulations.

### Data assessment

Dietary intake of fermented foods (*miso* soup, yogurt, cheese, and *natto* [Japanese fermented soybeans]) was determined using the Food Frequency Questionnaire, which is a self-administered, semi-quantitative instrument that has been validated for use in large-scale Japanese epidemiologic studies [17]. Participants were asked how often and how much they consumed each food type during the second and third trimesters (covering dietary intake after learning of the pregnancy). For *miso* soup, 6 frequency categories were used to record general consumption (almost none to every day), 9 frequency categories were used to record the frequency of daily consumption (< 1 time to  $\geq 10$  times), and 5 frequency categories were used for reporting the taste of *miso* (very bland to very strong). Daily intake of *miso* soup (g/day) was then calculated by multiplying the frequency of general consumption by the frequency of daily consumption and by the taste. For the other three fermented foods, yogurt, cheese, and *natto*, the standard portion size for each food type was categorized as small (50% smaller than standard), medium (same as standard), or large (50% larger than standard). Nine frequency categories for each item were used to record intake (< 1 time/month to  $\geq 7$  times/day). The daily intake of each of the three fermented foods was calculated by multiplying the frequency of consumption by the standard portion size and each was allocated into quartiles by their amount (g/day).

To measure infant sleep duration at 1 year after delivery, parents were asked on the questionnaire to indicate when their infant slept on the previous day. Parents marked the times when their infant was asleep by drawing lines through boxes indicating 30 min intervals from 12:00 am to 12:00 am the next day.

Covariates were adjusted for energy intake, maternal age, previous deliveries, body mass index at 1 month after delivery, maternal highest educational level, annual household income, marital status at 6 months after delivery, alcohol intake at 1 month after delivery, smoking status at 1 month after delivery, employment status at 1 year after delivery, infant sex, infant attendance at nursery, where the infant slept at night, birth weight, gestational period, presence of any disease, date (month) of birth, yogurt intake at 1 year old, and cheese intake at 1 year old.

### Statistical analysis

Unless otherwise stated, data are expressed as the mean  $\pm$  standard deviation or median. Participants were categorized according to quartile for fermented food intake in order to estimate

the risk of infant sleep duration shorter than 11 h. Sleep duration of 11–14 h of sleep in a 24-h period is recommended for 1-year-old infants by the United States National Sleep Foundation [18]. We therefore chose 11 h as the lower limit of appropriate sleep duration.

Odds ratios (ORs) and 95% confidence intervals (CIs) were calculated using logistic regression analysis, with the lowest quartile used as a reference. Adjusted ORs were calculated using the covariates mentioned in the previous section whereas crude ORs were calculated without use of these covariates. In tests for trend, categorical numbers were assigned to the quartile distributions for intake of each fermented food and were evaluated as continuous variables. Statistical significance was set at a 2-sided  $p$  value of  $< 0.05$ . Analyses were performed with SAS version 9.4 (SAS Institute Inc., Cary, NC).

## Results

[Table 1](#) shows maternal characteristics according to quartile for *miso* intake during pregnancy. Those with higher *miso* intake were more likely to have high energy intake, to be multiparous, and to be a non-smoker.

Unlike *miso*, three of the fermented foods—yogurt, cheese, and *natto*—showed similar characteristics according to quartile. Characteristics for yogurt are shown in [Table 2](#); due to their similarity with yogurt, characteristics for cheese and *natto* are shown in [S1](#) and [S2](#) Tables, respectively. Pregnant women with higher intake of yogurt, cheese, and *natto* were more likely to be older, to have high energy intake, to have a higher education level, to have higher household income, to be employed, to be a non-smoker, and to be multiparous and they were less likely to send their infant to nursery.

As for a possible selection bias, of the 104,065 records at baseline, 31,441 records were excluded for the 1-year analysis based on the exclusion criteria described above. Compared with excluded subjects, included subjects were more likely to eat yogurt and cheese, to be a nonsmoker, to have a higher education level, to have higher income, and to have babies with a heavier birth weight. There were no meaningful differences among the other covariates.

The ORs for infants not achieving the 11-h sleep duration target were evaluated based on the intake of probiotics by pregnant women in the second and third trimesters. The four probiotic food items evaluated were *miso*, yogurt, cheese, and *natto*. In the *miso* evaluation, ORs for inadequate sleep duration were significantly lower in infants with mothers in the upper (3rd and 4th) intake quartiles, and these associations were significant according to a trend test ([Table 3](#)).

## Discussion

In this study, we exploited an opportunity afforded by the J ECS study to investigate sleep duration in 1-year-old infants, using questionnaire responses from 72,624 mothers for whom sufficient data were available. Our investigations showed that the risk of inadequate sleep duration ( $< 11$  h) was significantly lower in the infants of mothers with high *miso* intake during the pregnancy.

The hypothesis for this study was that maternal intake of fermented food during pregnancy affects sleep duration in infants. We generated our hypothesis after reviewing a number of reports. Recent animal studies have shown that circadian rhythm is regulated by the liver and gut as well as the suprachiasmatic nucleus [19–21]. It has been reported that the intestinal microbiota has circadian rhythm [22, 23]. Intestinal microbiota is reported to be needed for the proper regulation of circadian rhythm, according to a comparison of the expression of the hepatic and mediobasal hypothalamic clock genes (*Bmal1* and *clock*) in intestinal-microbe-free mice and conventional mice; circadian rhythm was recognized in conventional mice but

Table 1. Characteristics according to quartile for *miso* intake during pregnancy in women (N = 72,624).

|                                                                            | Quartile for <i>miso</i> intake |        |         |        |        |        |        |        |         |        |
|----------------------------------------------------------------------------|---------------------------------|--------|---------|--------|--------|--------|--------|--------|---------|--------|
|                                                                            | Total                           |        | 1 (low) |        | 2      |        | 3      |        | 4(high) |        |
| <b>Median intake of energy<sup>a</sup></b>                                 | 1,623                           |        | 1,506   |        | 1,586  |        | 1,648  |        | 1,747   |        |
| <b>Age at delivery, years</b>                                              | 31.5                            |        | 31.3    |        | 31.3   |        | 31.8   |        | 31.6    |        |
| <b>Previous deliveries, n (%)</b>                                          |                                 |        |         |        |        |        |        |        |         |        |
| Nullipara                                                                  | 29,896                          | (41.2) | 8,677   | (46.7) | 6,493  | (42.0) | 7,980  | (39.3) | 6,746   | (37.0) |
| Multipara                                                                  | 42,728                          | (58.8) | 9,924   | (53.4) | 8,970  | (58.0) | 12,346 | (60.7) | 11,488  | (63.0) |
| <b>BMI (kg/m<sup>2</sup>), n (%)</b>                                       |                                 |        |         |        |        |        |        |        |         |        |
| <18.5                                                                      | 3,593                           | (4.9)  | 940     | (5.1)  | 761    | (4.9)  | 1,045  | (5.1)  | 847     | (4.7)  |
| 18.5-<25                                                                   | 57,813                          | (79.6) | 14,547  | (78.2) | 12,288 | (79.5) | 16,476 | (81.1) | 14,502  | (79.5) |
| ≥25                                                                        | 11,218                          | (15.4) | 3,114   | (16.7) | 2,414  | (15.6) | 2,805  | (13.8) | 2,885   | (15.8) |
| <b>Highest educational level, n (%)</b>                                    |                                 |        |         |        |        |        |        |        |         |        |
| Junior high school or high school                                          | 24,079                          | (33.2) | 6,472   | (34.8) | 5,024  | (32.5) | 6,288  | (30.9) | 6,295   | (34.5) |
| Technical junior college, technical/vocational college or associate degree | 31,375                          | (43.2) | 7,894   | (42.4) | 6,718  | (43.5) | 8,897  | (43.8) | 7,866   | (43.1) |
| Bachelor's degree or higher                                                | 17,170                          | (23.6) | 4,235   | (22.8) | 3,721  | (24.1) | 5,141  | (25.3) | 4,073   | (22.3) |
| <b>Annual household income (JPY), n (%)</b>                                |                                 |        |         |        |        |        |        |        |         |        |
| <4 million                                                                 | 28,059                          | (38.6) | 7,579   | (40.8) | 6,090  | (39.4) | 7,436  | (36.6) | 6,954   | (38.1) |
| 4–6 million                                                                | 24,453                          | (33.7) | 6,051   | (32.5) | 5,189  | (33.6) | 6,987  | (34.4) | 6,226   | (34.2) |
| >6 million                                                                 | 20,112                          | (27.7) | 4,971   | (26.7) | 4,184  | (27.1) | 5,903  | (29.0) | 5,054   | (27.7) |
| <b>Marital status, n (%)</b>                                               |                                 |        |         |        |        |        |        |        |         |        |
| Married (including common law marriage)                                    | 71,598                          | (98.6) | 18,238  | (98.1) | 15,239 | (98.6) | 20,106 | (98.9) | 18,015  | (98.8) |
| Divorced or Widowed                                                        | 490                             | (0.7)  | 167     | (0.9)  | 102    | (0.7)  | 108    | (0.5)  | 113     | (0.6)  |
| Other                                                                      | 536                             | (0.7)  | 196     | (1.1)  | 122    | (0.8)  | 112    | (0.6)  | 106     | (0.6)  |
| <b>Alcohol intake, n (%)</b>                                               |                                 |        |         |        |        |        |        |        |         |        |
| Never                                                                      | 66,560                          | (91.7) | 16,937  | (91.1) | 14,146 | (91.5) | 18,696 | (92.0) | 16,781  | (92.0) |
| Ex-drinker                                                                 | 3,201                           | (4.4)  | 835     | (4.5)  | 696    | (4.5)  | 890    | (4.4)  | 780     | (4.3)  |
| 1–3 times/month                                                            | 1,971                           | (2.7)  | 554     | (3.0)  | 444    | (2.9)  | 526    | (2.6)  | 447     | (2.5)  |
| ≥ 1 time/week                                                              | 892                             | (1.2)  | 275     | (1.5)  | 177    | (1.1)  | 214    | (1.1)  | 226     | (1.2)  |
| <b>Smoking status, n (%)</b>                                               |                                 |        |         |        |        |        |        |        |         |        |
| Never                                                                      | 43,820                          | (60.3) | 10,985  | (59.1) | 9,409  | (60.9) | 12,429 | (61.2) | 10,997  | (60.3) |
| Did previously but quit before learning of pregnancy                       | 16,861                          | (23.2) | 4,245   | (22.8) | 3,569  | (23.1) | 4,786  | (23.6) | 4,261   | (23.4) |
| Did previously but quit after learning of pregnancy                        | 9,426                           | (13.0) | 2,589   | (13.9) | 1,949  | (12.6) | 2,496  | (12.3) | 2,392   | (13.1) |
| Currently smoking                                                          | 2,517                           | (3.5)  | 782     | (4.2)  | 536    | (3.5)  | 615    | (3.0)  | 584     | (3.2)  |
| <b>Employed, n (%)</b>                                                     |                                 |        |         |        |        |        |        |        |         |        |
| No                                                                         | 37,404                          | (51.5) | 9,496   | (51.1) | 8,175  | (52.9) | 10,637 | (52.3) | 9,096   | (49.9) |
| Yes                                                                        | 35,220                          | (48.5) | 9,105   | (49.0) | 7,288  | (47.1) | 9,689  | (47.7) | 9,138   | (50.1) |
| <b>Infant sex, n (%)</b>                                                   |                                 |        |         |        |        |        |        |        |         |        |
| Boy                                                                        | 37,109                          | (51.1) | 9,485   | (51.0) | 7,963  | (51.5) | 10,422 | (51.3) | 9,239   | (50.7) |
| Girl                                                                       | 35,515                          | (48.9) | 9,116   | (49.0) | 7,500  | (48.5) | 9,904  | (48.7) | 8,995   | (49.3) |
| <b>Nursery attendance, n (%)</b>                                           |                                 |        |         |        |        |        |        |        |         |        |
| No                                                                         | 52,804                          | (72.7) | 13,399  | (72.0) | 11,373 | (73.6) | 14,850 | (73.1) | 13,182  | (72.3) |
| Yes                                                                        | 19,820                          | (27.3) | 5,202   | (28.0) | 4,090  | (26.5) | 5,476  | (26.9) | 5,052   | (27.7) |
| <b>Location where infant sleeps at night, n (%)</b>                        |                                 |        |         |        |        |        |        |        |         |        |
| In parent's bed                                                            | 55,757                          | (76.8) | 14,122  | (75.9) | 11,832 | (76.5) | 15,610 | (76.8) | 14,193  | (77.8) |
| In baby bed in parents' bedroom                                            | 16,395                          | (22.6) | 4,321   | (23.2) | 3,534  | (22.9) | 4,607  | (22.7) | 3,933   | (21.6) |
| In baby bed in another room                                                | 389                             | (0.5)  | 137     | (0.7)  | 83     | (0.5)  | 87     | (0.4)  | 82      | (0.5)  |

(Continued)

Table 1. (Continued)

|                   | Quartile for <i>miso</i> intake |        |         |        |       |        |       |        |         |        |
|-------------------|---------------------------------|--------|---------|--------|-------|--------|-------|--------|---------|--------|
|                   | Total                           |        | 1 (low) |        | 2     |        | 3     |        | 4(high) |        |
| Other             | 83                              | (0.1)  | 21      | (0.1)  | 14    | (0.1)  | 22    | (0.1)  | 26      | (0.1)  |
| Birth weight, g   | 3,030                           |        | 3,028   |        | 3,026 |        | 3,029 |        | 3,039   |        |
| Gestational weeks | 39.3                            |        | 39.3    |        | 39.3  |        | 39.3  |        | 39.2    |        |
| Disease, n (%)    | 13,775                          | (19.0) | 3,668   | (19.7) | 3,051 | (19.7) | 3,698 | (18.2) | 3,358   | (18.4) |

<sup>a</sup> Dietary intake between learning of pregnancy and second/third trimester.

BMI, body mass index

<https://doi.org/10.1371/journal.pone.0222792.t001>

disrupted in the gut-microbe-free mice [24]. According to another report [25], patterns resembling a sleep-wake rhythm are observable through ultrasonographic monitoring of infant eyeball movement during the gestation period. This fetal sleep-wake cycle is surmised to be heavily influenced by maternal lifestyle factors such as diet and sleeping. Furthermore, maternal melatonin is known to have an effect on the fetus via placental transmission [26, 27]. Accordingly, maternal lifestyle is suggested to affect the healthy establishment of a circadian rhythm during fetal development.

Based on the above reports, we have developed the following, albeit hypothetical, line of reasoning. High fermented food intake during pregnancy has an effect on the intestinal microbiota of the expectant mother, and fetal circadian rhythm is also affected. Furthermore, intestinal microbiota migrates to the baby at the time of birth and produces changes in the baby’s intestinal microbiome [10]. We consider that this chain of causation leads to variation in sleep duration for the neonate or infant. In fact, although the pronounced rhythms in the sleep-wake cycle and in hormone secretion generally developed after 2 months of age [28], circadian rhythms have been observed for a number of different hormones and circulating factors as children age [29]. Accordingly, this association in older children must be studied. In this study, we did not directly investigate changes in the intestinal microbiota, and our study thus amounts to no more than supporting evidence at this time; nevertheless, our results provide indirect support for one part of the chain of causation referred to above.

This study had two main strengths: first, it was a large-scale study and, second, it used a validated questionnaire [17]. However, this study also has some limitations. We did not directly investigate changes in intestinal microbiota and this represents a weakness and limitation of the study, as stated above. Our reliance on maternal reporting of infant sleep duration is another limitation of this study. We observed that well-educated, employed, and higher-income women tended to have higher intake of fermented foods. To explain this, we surmise that these women are sufficiently knowledgeable about factors contributing to health and they therefore tend to select nutrient-rich options such as fermented foods more frequently than nutrient-deficient options like so-called junk food, and this health consciousness might affect the sleep duration of their infants. As such, our assumption that the results of our study reflected changes in intestinal microbiota remains a theory. Additional studies with different designs are needed to test this hypothesis, and they should examine indicators of changes in maternal intestinal flora and the condition of infant intestinal flora.

## Conclusion

In this study, we found that consumption of fermented food by expectant mothers was positively associated with infant sleep duration at 1 year of age, and we inferred that this association might be the result of changes in the gut microbiota of expectant mothers affected via

Table 2. Characteristics according to quartile for yogurt intake during pregnancy in women (N = 72,624).

|                                                                            | Quartile for yogurt intake |        |         |        |        |        |        |        |         |        |
|----------------------------------------------------------------------------|----------------------------|--------|---------|--------|--------|--------|--------|--------|---------|--------|
|                                                                            | Total                      |        | 1 (low) |        | 2      |        | 3      |        | 4(high) |        |
| <b>Median intake of energy<sup>a</sup></b>                                 | 1,623                      |        | 1,451   |        | 1,589  |        | 1,655  |        | 1,797   |        |
| <b>Age at delivery, years</b>                                              | 31.5                       |        | 30.8    |        | 31.4   |        | 31.7   |        | 32.1    |        |
| <b>Previous deliveries, n (%)</b>                                          |                            |        |         |        |        |        |        |        |         |        |
| Nullipara                                                                  | 29,896                     | (41.2) | 7,221   | (36.8) | 5,883  | (35.8) | 6,771  | (42.4) | 10,021  | (48.7) |
| Multipara                                                                  | 42,728                     | (58.8) | 12,413  | (63.2) | 10,570 | (64.2) | 9,206  | (57.6) | 10,539  | (51.3) |
| <b>BMI (kg/m<sup>2</sup>), n (%)</b>                                       |                            |        |         |        |        |        |        |        |         |        |
| <18.5                                                                      | 3,593                      | (4.9)  | 899     | (4.6)  | 765    | (4.7)  | 797    | (5.0)  | 1,132   | (5.5)  |
| 18.5-<25                                                                   | 57,813                     | (79.6) | 15,145  | (77.1) | 13,078 | (79.5) | 12,845 | (80.4) | 16,745  | (81.4) |
| ≥25                                                                        | 11,218                     | (15.4) | 3,590   | (18.3) | 2,610  | (15.9) | 2,335  | (14.6) | 2,683   | (13.1) |
| <b>Highest educational level, n (%)</b>                                    |                            |        |         |        |        |        |        |        |         |        |
| Junior high school or high school                                          | 24,079                     | (33.2) | 8,490   | (43.2) | 5,646  | (34.3) | 4,693  | (29.4) | 5,250   | (25.5) |
| Technical junior college, technical/vocational college or associate degree | 31,375                     | (43.2) | 7,699   | (39.2) | 7,136  | (43.4) | 7,175  | (44.9) | 9,365   | (45.6) |
| Bachelor's degree or higher                                                | 17,170                     | (23.6) | 3,445   | (17.6) | 3,671  | (22.3) | 4,109  | (25.7) | 5,945   | (28.9) |
| <b>Annual household income (JPY), n (%)</b>                                |                            |        |         |        |        |        |        |        |         |        |
| <4 million                                                                 | 28,059                     | (38.6) | 9,177   | (46.7) | 6,504  | (39.5) | 5,789  | (36.2) | 6,589   | (32.1) |
| 4–6 million                                                                | 24,453                     | (33.7) | 6,240   | (31.8) | 5,607  | (34.1) | 5,444  | (34.1) | 7,162   | (34.8) |
| >6 million                                                                 | 20,112                     | (27.7) | 4,217   | (21.5) | 4,342  | (26.4) | 4,744  | (29.7) | 6,809   | (33.1) |
| <b>Marital status, n (%)</b>                                               |                            |        |         |        |        |        |        |        |         |        |
| Married (including common law marriage)                                    | 71,598                     | (98.6) | 19,254  | (98.1) | 16,226 | (98.6) | 15,779 | (98.8) | 20,339  | (98.9) |
| Divorced or Widowed                                                        | 490                        | (0.7)  | 192     | (1.0)  | 99     | (0.6)  | 94     | (0.6)  | 105     | (0.5)  |
| Other                                                                      | 536                        | (0.7)  | 188     | (1.0)  | 128    | (0.8)  | 104    | (0.7)  | 116     | (0.6)  |
| <b>Alcohol intake, n (%)</b>                                               |                            |        |         |        |        |        |        |        |         |        |
| Never                                                                      | 66,560                     | (91.7) | 17,657  | (89.9) | 15,035 | (91.4) | 14,719 | (92.1) | 19,149  | (93.1) |
| Ex-drinker                                                                 | 3,201                      | (4.4)  | 982     | (5.0)  | 740    | (4.5)  | 683    | (4.3)  | 796     | (3.9)  |
| 1–3 times/month                                                            | 1,971                      | (2.7)  | 634     | (3.2)  | 479    | (2.9)  | 416    | (2.6)  | 442     | (2.2)  |
| ≥ 1 time/week                                                              | 892                        | (1.2)  | 361     | (1.8)  | 199    | (1.2)  | 159    | (1.0)  | 173     | (0.8)  |
| <b>Smoking status, n (%)</b>                                               |                            |        |         |        |        |        |        |        |         |        |
| Never                                                                      | 43,820                     | (60.3) | 10,313  | (52.5) | 9,854  | (59.9) | 10,021 | (62.7) | 13,632  | (66.3) |
| Did previously but quit before learning of pregnancy                       | 16,861                     | (23.2) | 4,689   | (23.9) | 3,835  | (23.3) | 3,701  | (23.2) | 4,636   | (22.6) |
| Did previously but quit after learning of pregnancy                        | 9,426                      | (13.0) | 3,469   | (17.7) | 2,177  | (13.2) | 1,849  | (11.6) | 1,931   | (9.4)  |
| Currently smoking                                                          | 2,517                      | (3.5)  | 1,163   | (5.9)  | 587    | (3.6)  | 406    | (2.5)  | 361     | (1.8)  |
| <b>Employed, n (%)</b>                                                     |                            |        |         |        |        |        |        |        |         |        |
| No                                                                         | 37,404                     | (51.5) | 10,117  | (51.5) | 8,429  | (51.2) | 8,128  | (50.9) | 10,730  | (52.2) |
| Yes                                                                        | 35,220                     | (48.5) | 9,517   | (48.5) | 8,024  | (48.8) | 7,849  | (49.1) | 9,830   | (47.8) |
| <b>Infant sex, n (%)</b>                                                   |                            |        |         |        |        |        |        |        |         |        |
| Boy                                                                        | 37,109                     | (51.1) | 9,965   | (50.8) | 8,386  | (51.0) | 8,253  | (51.7) | 10,505  | (51.1) |
| Girl                                                                       | 35,515                     | (48.9) | 9,669   | (49.3) | 8,067  | (49.0) | 7,724  | (48.3) | 10,055  | (48.9) |
| <b>Nursery attendance, n (%)</b>                                           |                            |        |         |        |        |        |        |        |         |        |
| No                                                                         | 52,804                     | (72.7) | 13,798  | (70.3) | 11,895 | (72.3) | 11,669 | (73.0) | 15,442  | (75.1) |
| Yes                                                                        | 19,820                     | (27.3) | 5,836   | (29.7) | 4,558  | (27.7) | 4,308  | (27.0) | 5,118   | (24.9) |
| <b>Location where infant sleeps at night, n (%)</b>                        |                            |        |         |        |        |        |        |        |         |        |
| In parent's bed                                                            | 55,757                     | (76.8) | 15,440  | (78.6) | 12,913 | (78.5) | 12,292 | (76.9) | 15,112  | (73.5) |
| In baby bed in parents' bedroom                                            | 16,395                     | (22.6) | 4,069   | (20.7) | 3,446  | (20.9) | 3,579  | (22.4) | 5,301   | (25.8) |
| In baby bed in another room                                                | 389                        | (0.5)  | 100     | (0.5)  | 78     | (0.5)  | 85     | (0.5)  | 126     | (0.6)  |
| Other                                                                      | 83                         | (0.1)  | 25      | (0.1)  | 16     | (0.1)  | 21     | (0.1)  | 21      | (0.1)  |
| <b>Birth weight, g</b>                                                     | 3,030                      |        | 3,024   |        | 3,036  |        | 3,033  |        | 3,030   |        |
| <b>Gestational weeks</b>                                                   | 39.3                       |        | 39.3    |        | 39.3   |        | 39.3   |        | 39.3    |        |

(Continued)



Table 2. (Continued)

| Disease, n (%) | Quartile for yogurt intake |        |         |        |       |        |       |        |         |        |
|----------------|----------------------------|--------|---------|--------|-------|--------|-------|--------|---------|--------|
|                | Total                      |        | 1 (low) |        | 2     |        | 3     |        | 4(high) |        |
|                | 13,775                     | (19.0) | 3,712   | (18.9) | 3,112 | (18.9) | 3,062 | (19.2) | 3,889   | (18.9) |

<sup>a</sup> Dietary intake between learning of pregnancy and second/third trimester.

BMI, body mass index

<https://doi.org/10.1371/journal.pone.0222792.t002>

Table 3. Odds ratios (95% confidence intervals) for 1-year-old infants for risk of sleeping less than 11 hours according to quartile for maternal intake of fermented food during pregnancy (N = 72,624).

|                                                   | Quartiles for fermented food intake |                         |                         |                         | P-value for trend |
|---------------------------------------------------|-------------------------------------|-------------------------|-------------------------|-------------------------|-------------------|
|                                                   | 1 (low)                             | 2                       | 3                       | 4(high)                 |                   |
| <b>Median intake of miso, g/day<sup>a</sup></b>   | 10.0                                | 32.1                    | 88.4                    | 225.0                   |                   |
| Total                                             | 18,601                              | 15,463                  | 20,326                  | 18,234                  |                   |
| Cases                                             | 1,874                               | 1,413                   | 1,787                   | 1,703                   |                   |
| Crude odds ratio                                  | 1.00                                | <b>0.90 (0.83–0.97)</b> | <b>0.86 (0.80–0.92)</b> | <b>0.92 (0.86–0.99)</b> | <b>0.005</b>      |
| Adjusted odds ratio <sup>b</sup>                  | 1.00                                | <b>0.92 (0.85–0.98)</b> | <b>0.87 (0.82–0.94)</b> | <b>0.92 (0.86–0.99)</b> | <b>0.009</b>      |
| <b>Median intake of yogurt, g/day<sup>a</sup></b> | 8.0                                 | 25.7                    | 60.0                    | 120.0                   |                   |
| Total                                             | 19,634                              | 16,453                  | 15,977                  | 20,560                  |                   |
| Cases                                             | 1,902                               | 1,498                   | 1,420                   | 1,957                   |                   |
| Crude odds ratio                                  | 1.00                                | 0.93 (0.87–1.00)        | <b>0.91 (0.85–0.98)</b> | 0.98 (0.92–1.05)        | 0.5               |
| Adjusted odds ratio <sup>b</sup>                  | 1.00                                | 0.96 (0.89–1.03)        | 0.93 (0.86–1.00)        | 0.99 (0.92–1.07)        | 0.8               |
| <b>Median intake of cheese, g/day<sup>a</sup></b> | 0.0                                 | 1.3                     | 4.3                     | 10.0                    |                   |
| Total                                             | 17,636                              | 18,552                  | 18,984                  | 17,452                  |                   |
| Cases                                             | 1,748                               | 1,709                   | 1,679                   | 1,641                   |                   |
| Crude odds ratio                                  | 1.00                                | 0.92 (0.86–0.99)        | 0.88 (0.82–0.95)        | 0.94 (0.88–1.01)        | <b>0.049</b>      |
| Adjusted odds ratio <sup>b</sup>                  | 1.00                                | 0.94 (0.88–1.01)        | 0.92 (0.85–0.99)        | 0.97 (0.90–1.05)        | 0.4               |
| <b>Median intake of natto, g/day<sup>a</sup></b>  | 0.0                                 | 3.3                     | 10.7                    | 25.0                    |                   |
| Total                                             | 12,997                              | 17,302                  | 25,058                  | 17,267                  |                   |
| Cases                                             | 1,273                               | 1,630                   | 2,257                   | 1,617                   |                   |
| Crude odds ratio                                  | 1.00                                | 0.96 (0.89–1.03)        | <b>0.91 (0.85–0.98)</b> | 0.95 (0.88–1.03)        | 0.11              |
| Adjusted odds ratio <sup>b</sup>                  | 1.00                                | 0.98 (0.90–1.06)        | 0.94 (0.88–1.02)        | 0.98 (0.90–1.06)        | 0.4               |

<sup>a</sup> Dietary intake between learning of pregnancy and second/third trimester.

<sup>b</sup> Covariates were adjusted for energy intake, maternal age, previous deliveries, BMI at 1 month after delivery, maternal highest educational level, annual household income, marital status at 6 months after delivery, alcohol intake at 1 month after delivery, smoking status at 1 month after delivery, employment status at 1 year after delivery, infant sex, infant attending nursery, location where infant slept at night, birth weight, gestational weeks, presence of any disease, date of birth, yogurt intake at 1 year old, and cheese intake at 1 year old.

<https://doi.org/10.1371/journal.pone.0222792.t003>

their consumption of fermented food. To confirm our hypothesis, further research about the microbiota of women during pregnancy and that of their infants will be required.

### Supporting information

**S1 Table. Characteristics according to quartile for cheese intake during pregnancy in women (N = 72,624).** <sup>a</sup> Dietary intake between learning of pregnancy and second/third trimester. BMI, body mass index.

(DOCX)

**S2 Table. Characteristics according to quartile for natto intake during pregnancy in women (N = 72,624).** <sup>a</sup> Dietary intake between learning of pregnancy and second/third trimester. BMI, body mass index. (DOCX)

## Acknowledgments

We are grateful to all of the participants of the JECS and to all individuals involved in data collection. The JECS was funded by the Ministry of the Environment, Japan. The findings and conclusions of this article are solely the responsibility of the authors and do not represent the official views of the Ministry of the Environment, Japan.

We also thank the following members of the JECS (principal investigator, Michihiro Kamijima; e-mail address, [jecscore@nies.go.jp](mailto:jecscore@nies.go.jp)) as of 2019: Shin Yamazaki (National Institute for Environmental Studies, Tsukuba, Japan), Yukihiro Ohya (National Center for Child Health and Development, Tokyo, Japan), Reiko Kishi (Hokkaido University, Sapporo, Japan), Nobuo Yaegashi (Tohoku University, Sendai, Japan), Koichi Hashimoto (Fukushima Medical University, Fukushima, Japan), Chisato Mori (Chiba University, Chiba, Japan), Shuichi Ito (Yokohama City University, Yokohama, Japan), Zentarō Yamagata (University of Yamanashi, Chuo, Japan), Hidekuni Inadera (University of Toyama, Toyama, Japan), Michihiro Kamijima (Nagoya City University, Nagoya, Japan), Takeo Nakayama (Kyoto University, Kyoto, Japan), Hiroyasu Iso (Osaka University, Suita, Japan), Masayuki Shima (Hyogo College of Medicine, Nishinomiya, Japan), Youichi Kurozawa (Tottori University, Yonago, Japan), Narufumi Suganuma (Kochi University, Nankoku, Japan), Koichi Kusuhara (University of Occupational and Environmental Health, Kitakyushu, Japan), and Takahiko Katoh (Kumamoto University, Kumamoto, Japan).

## Author Contributions

**Formal analysis:** Kei Hamazaki, Kenta Matsumura.

**Investigation:** Haruka Kasamatsu, Akiko Tsuchida, Hidekuni Inadera.

**Supervision:** Kei Hamazaki.

**Writing – original draft:** Narumi Sugimori.

## References

1. Touchette E, Cote SM, Petit D, Liu X, Boivin M, Falissard B, et al. Short nighttime sleep-duration and hyperactivity trajectories in early childhood. *Pediatrics*. 2009; 124(5):e985–93. Epub 2009/10/21. <https://doi.org/10.1542/peds.2008-2005> PMID: 19841107.
2. Sekine M, Yamagami T, Handa K, Saito T, Nanri S, Kawaminami K, et al. A dose-response relationship between short sleeping hours and childhood obesity: results of the Toyama Birth Cohort Study. *Child Care Health Dev*. 2002; 28(2):163–70. Epub 2002/04/16. PMID: 11952652.
3. Reilly JJ, Armstrong J, Dorosty AR, Emmett PM, Ness A, Rogers I, et al. Early life risk factors for obesity in childhood: cohort study. *BMJ*. 2005; 330(7504):1357. Epub 2005/05/24. <https://doi.org/10.1136/bmj.38470.670903.E0> PMID: 15908441; PubMed Central PMCID: PMC558282.
4. Sullivan A, Nord CE. Probiotics and gastrointestinal diseases. *J Intern Med*. 2005; 257(1):78–92. Epub 2004/12/21. <https://doi.org/10.1111/j.1365-2796.2004.01410.x> PMID: 15606379.
5. Butel MJ. Probiotics, gut microbiota and health. *Med Mal Infect*. 2014; 44(1):1–8. Epub 2013/12/03. <https://doi.org/10.1016/j.medmal.2013.10.002> PMID: 24290962.
6. D R. The effect of probiotic supplementation on self-reported sleep quality. 2016.
7. Gille D, Schmid A, Walther B, Vergeres G. Fermented Food and Non-Communicable Chronic Diseases: A Review. *Nutrients*. 2018; 10(4). Epub 2018/04/05. <https://doi.org/10.3390/nu10040448> PMID: 29617330; PubMed Central PMCID: PMC5946233.

8. Mantaring J, Benyacoub J, Destura R, Pecquet S, Vidal K, Volger S, et al. Effect of maternal supplement beverage with and without probiotics during pregnancy and lactation on maternal and infant health: a randomized controlled trial in the Philippines. *BMC Pregnancy Childbirth*. 2018; 18(1):193. Epub 2018/06/02. <https://doi.org/10.1186/s12884-018-1828-8> PMID: 29855271; PubMed Central PMCID: PMC5984298.
9. Sanz Y. Gut microbiota and probiotics in maternal and infant health. *Am J Clin Nutr*. 2011; 94(6 Suppl):2000S–5S. Epub 2011/05/06. <https://doi.org/10.3945/ajcn.110.001172> PMID: 21543533.
10. Backhed F, Roswall J, Peng Y, Feng Q, Jia H, Kovatcheva-Datchary P, et al. Dynamics and Stabilization of the Human Gut Microbiome during the First Year of Life. *Cell Host Microbe*. 2015; 17(5):690–703. Epub 2015/05/15. <https://doi.org/10.1016/j.chom.2015.04.004> PMID: 25974306.
11. Nuriel-Ohayon M, Neuman H, Koren O. Microbial Changes during Pregnancy, Birth, and Infancy. *Front Microbiol*. 2016; 7:1031. Epub 2016/07/30. <https://doi.org/10.3389/fmicb.2016.01031> PMID: 27471494; PubMed Central PMCID: PMC4943946.
12. Stewart CJ, Ajami NJ, O'Brien JL, Hutchinson DS, Smith DP, Wong MC, et al. Temporal development of the gut microbiome in early childhood from the TEDDY study. *Nature*. 2018; 562(7728):583–8. Epub 2018/10/26. <https://doi.org/10.1038/s41586-018-0617-x> PMID: 30356187; PubMed Central PMCID: PMC6415775.
13. Yang I, Corwin EJ, Brennan PA, Jordan S, Murphy JR, Dunlop A. The Infant Microbiome: Implications for Infant Health and Neurocognitive Development. *Nurs Res*. 2016; 65(1):76–88. Epub 2015/12/15. <https://doi.org/10.1097/NNR.000000000000133> PMID: 26657483; PubMed Central PMCID: PMC4681407.
14. Carlson AL, Xia K, Azcarate-Peril MA, Goldman BD, Ahn M, Styner MA, et al. Infant Gut Microbiome Associated With Cognitive Development. *Biol Psychiatry*. 2018; 83(2):148–59. Epub 2017/08/11. <https://doi.org/10.1016/j.biopsych.2017.06.021> PMID: 28793975; PubMed Central PMCID: PMC5724966.
15. Kawamoto T, Nitta H, Murata K, Toda E, Tsukamoto N, Hasegawa M, et al. Rationale and study design of the Japan environment and children's study (JECS). *BMC public health*. 2014; 14:25. Epub 2014/01/15. <https://doi.org/10.1186/1471-2458-14-25> PMID: 24410977; PubMed Central PMCID: PMC3893509.
16. Michikawa T, Nitta H, Nakayama SF, Yamazaki S, Isobe T, Tamura K, et al. Baseline Profile of Participants in the Japan Environment and Children's Study (JECS). *J Epidemiol*. 2018; 28(2):99–104. Epub 2017/11/03. <https://doi.org/10.2188/jea.JE20170018> PMID: 29093304; PubMed Central PMCID: PMC5792233.
17. Yokoyama Y, Takachi R, Ishihara J, Ishii Y, Sasazuki S, Sawada N, et al. Validity of Short and Long Self-Administered Food Frequency Questionnaires in Ranking Dietary Intake in Middle-Aged and Elderly Japanese in the Japan Public Health Center-Based Prospective Study for the Next Generation (JPHC-NEXT) Protocol Area. *J Epidemiol*. 2016; 26(8):420–32. Epub 2016/04/12. <https://doi.org/10.2188/jea.JE20150064> PMID: 27064130; PubMed Central PMCID: PMC4967663.
18. Hirshkowitz M, Whiton K, Albert SM, Alessi C, Bruni O, DonCarlos L, et al. National Sleep Foundation's updated sleep duration recommendations: final report. *Sleep Health*. 2015; 1(4):233–43. Epub 2015/12/01. <https://doi.org/10.1016/j.sleh.2015.10.004> PMID: 29073398.
19. Konturek PC, Brzozowski T, Konturek SJ. Gut clock: implication of circadian rhythms in the gastrointestinal tract. *J Physiol Pharmacol*. 2011; 62(2):139–50. Epub 2011/06/16. PMID: 21673361.
20. Pan X. Clock is important for food and circadian regulation of macronutrient absorption in mice. *Journal of Lipid Research*. 2009; 50:1800–13. <https://doi.org/10.1194/jlr.M900085-JLR200> PMID: 19387090
21. Scheving LA. Biological clocks and the digestive system. *Gastroenterology*. 2000; 119(2):536–49. Epub 2000/08/10. <https://doi.org/10.1053/gast.2000.9305> PMID: 10930389.
22. Thaiss CA, Zeevi D, Levy M, Zilberman-Schapira G, Suez J, Tengeler AC, et al. Transkingdom control of microbiota diurnal oscillations promotes metabolic homeostasis. *Cell*. 2014; 159(3):514–29. Epub 2014/11/25. <https://doi.org/10.1016/j.cell.2014.09.048> PMID: 25417104.
23. Liang X. Rhythmicity of the intestinal microbiota is regulated by gender and the host circadian clock. *PNAS*. 2015; 112(26):10479–84. <https://doi.org/10.1073/pnas.1501305112> PMID: 26240359
24. Leone V, Gibbons SM, Martinez K, Hutchison AL, Huang EY, Cham CM, et al. Effects of diurnal variation of gut microbes and high-fat feeding on host circadian clock function and metabolism. *Cell Host Microbe*. 2015; 17(5):681–9. Epub 2015/04/22. <https://doi.org/10.1016/j.chom.2015.03.006> PMID: 25891358; PubMed Central PMCID: PMC4433408.
25. Okawa H, Morokuma S, Maehara K, Arata A, Ohmura Y, Horinouchi T, et al. Eye movement activity in normal human fetuses between 24 and 39 weeks of gestation. *PLoS One*. 2017; 12(7):e0178722. Epub 2017/07/13. <https://doi.org/10.1371/journal.pone.0178722> PMID: 28700709; PubMed Central PMCID: PMC5507482.

26. Bisanti L, Olsen J, Basso O, Thonneau P, Karmaus W. Shift work and subfecundity: a European multi-center study. European Study Group on Infertility and Subfecundity. *J Occup Environ Med.* 1996; 38(4):352–8. Epub 1996/04/01. <https://doi.org/10.1097/00043764-199604000-00012> PMID: 8925318.
27. Mendez N, Abarzua-Catalan L, Vilches N, Galdames HA, Spichiger C, Richter HG, et al. Timed maternal melatonin treatment reverses circadian disruption of the fetal adrenal clock imposed by exposure to constant light. *PLoS One.* 2012; 7(8):e42713. Epub 2012/08/23. <https://doi.org/10.1371/journal.pone.0042713> PMID: 22912724; PubMed Central PMCID: PMC3418288.
28. Rivkees SA. Developing circadian rhythmicity in infants. *Pediatrics.* 2003; 112(2):373–81. Epub 2003/08/05. <https://doi.org/10.1542/peds.112.2.373> PMID: 12897290.
29. Hellbruegge T, Lange JE, Stehr K, Rutenfranz J. Circadian Periodicity of Physiological Functions in Different Stages of Infancy and Childhood. *Annals of the New York Academy of Sciences.* 1964; 117:361–73. Epub 1964/09/10. <https://doi.org/10.1111/j.1749-6632.1964.tb48193.x> PMID: 14196654.
